# Supplementary material for: Protein-conformational diseases in childhood: Naturally-occurring hIAPP amyloid-oligomers and early β-cell damage in obesity and diabetes
Source: PLoS One. 2020 Aug 24;15(8):e0237667. doi: 10.1371/journal.pone.0237667 (PMC7446879; doi:10.1371/journal.pone.0237667)

**Protein-conformational diseases in childhood: naturally-occurring hIAPP amyloid-oligomers and early cell damage in obesity and diabetes**

Nelly F. Altamirano-Bustamante1¶, Eulalia Garrido-Magaña2¶, Eugenia Morán3, Aurora Calderón 3, Karina Pasten-Hidalgo 1,4, Rosa Angélica Castillo-Rodríguez1,4, Gerardo Rojas2, Reyna Lara-Martínez5, Edgar Leyva-García3, Mateo Larralde-Laborde3, Guadalupe Domíguez6, Chiharu Murata1, Yolanda Margarita Vazquez1, Rafael Payro3, Manuel Barbosa3, Alejandro Valderrama1, Hortencia Montesinos1, Alejandra Domínguez-Camacho1, Víctor H. García-Olmos1, Regina Ferrer3, Patricia G. Medina-Bravo7, Fernanda Santoscoy3, Cristina Revilla-Monsalve3, Luis Felipe Jiménez-García5, Julio Morán 6, Jalil Villalobos Alva3, Mario Javier Villalobos3, Raúl Calzada-León1, Perla Altamirano3, Myriam M. Altamirano-Bustamante3 ¶,*

1Instituto Nacional de Pediatría, Mexico city, Mexico.

2UMAE Hospital de Pediatría, Centro Médico Nacional Siglo XXI, Instituto Mexicano del Seguro Social. Mexico city, Mexico.

3Unidad de Investigación en Enfermedades Metabólicas, Centro Médico Nacional Siglo XXI, Instituto Mexicano del Seguro Social, Mexico city, Mexico.

4Cátedras Conacyt.

5Facultad de Ciencias, UNAM, Mexico city, Mexico.

6Instituto de Fisiología Celular, UNAM, Mexico city, Mexico.

7Hospital Infantil Federico Gómez, Mexico city, Mexico.

*Corresponding author:

Email: [myriamab@unam.mx](mailto:myriamab@unam.mx). (MMAB)

¶These authors contributed equally to this article.

**SLOT BLOT anti-hIAPP cytotoxic oligomer prepared in house**


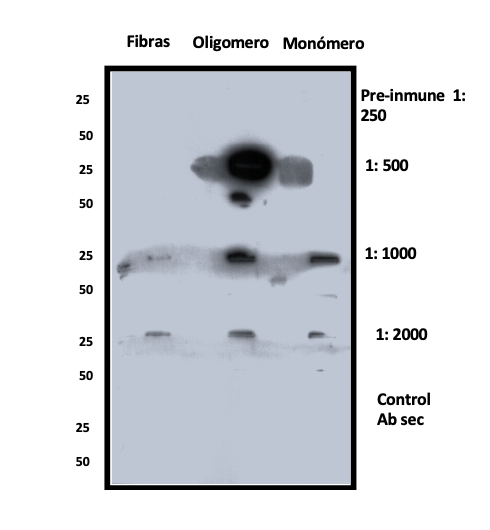


WB of patient´s PTS with anti-hIAPP cytotoxic oligomer


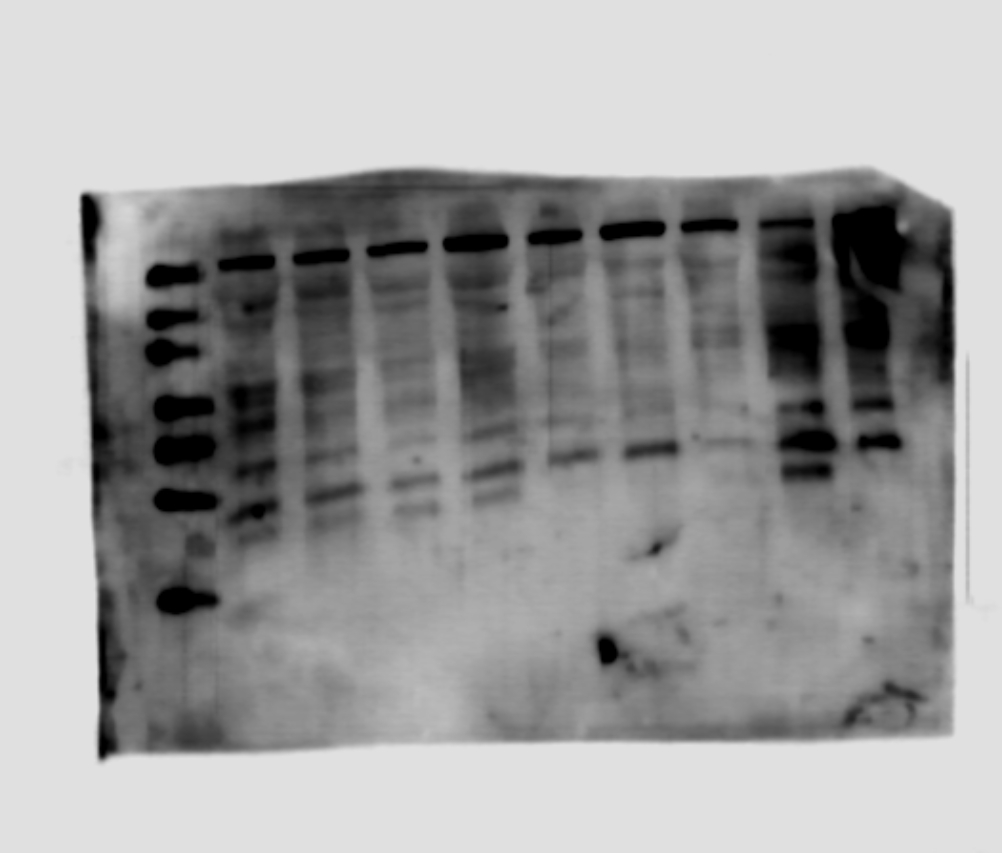


WB of patient´s PTS with A11


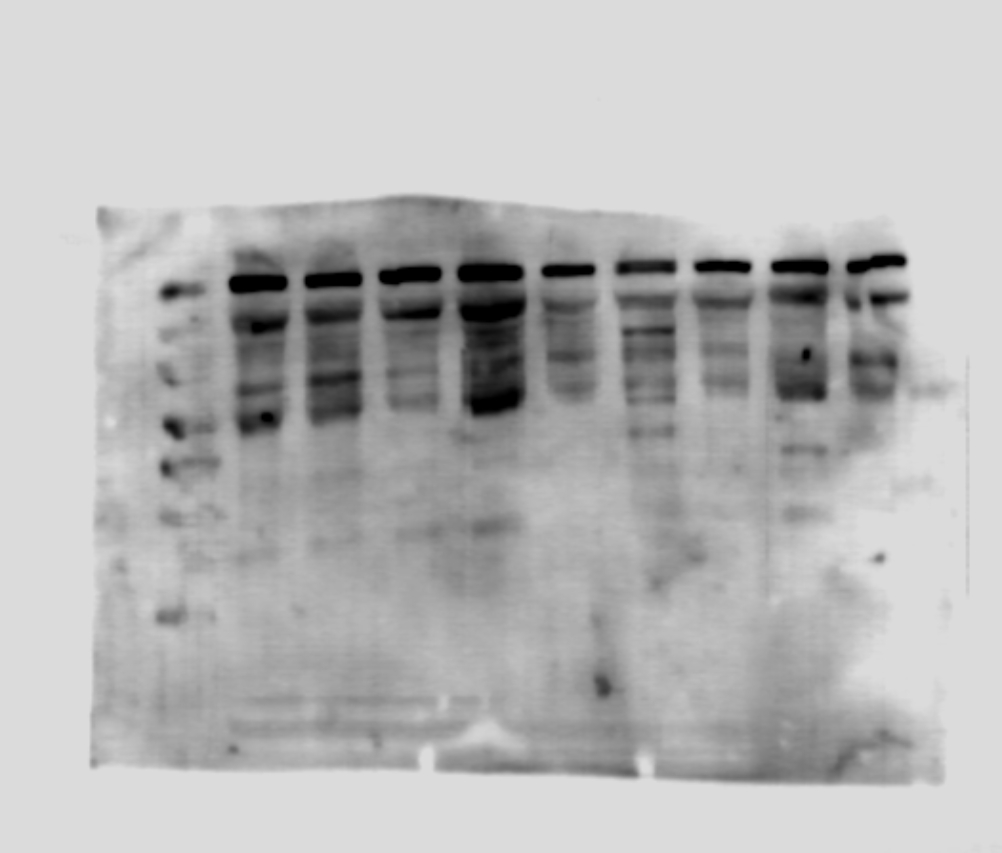

Supplement: S1 File — (DOCX) [file pone.0237667.s001.docx]
